# Supplementary material for: Acute hypoxia induces apoptosis of pancreatic β-cell by activation of the unfolded protein response and upregulation of CHOP
Source: PubMed Central journal article supplement — Cell Death Dis. 2012 Jun 14;3(6):e322–. doi: 10.1038/cddis.2012.66 (PMC3388238; doi:10.1038/cddis.2012.66), 2012-06-14
Supplement: cddis201266x8.pdf [file cddis201266x8.pdf]

## Supplementary Figure Legends

**Supplementary Fig. 1** Time course of hypoxia-induced apoptosis in Min6 cells. Min6 cells were cultured in normoxia or exposed to hypoxia (1% O<sub>2</sub>) for the indicated time points. Apoptosis was assessed by flow cytometry-based TUNEL assay.

**Supplementary Fig. 2** mRNA levels of caspase-3, UPR components and Bcl-2 family of proteins at latter time points of hypoxia exposure. Min6 cells were cultured at normoxia or hypoxia at indicated time points. mRNA expression levels were measured by qRT-PCR and normalized to  $\beta$ -actin (n=4; values are mean $\pm$ S.D.).

**Supplementary Fig. 3** Analysis of Min6 cells stably expressing a negative control shRNA (Control) or shRNAs targeting HIF-1 $\alpha$  (HIF-1 $\alpha$ #1, and HIF-1 $\alpha$ #2). **(a)** HIF-1 $\alpha$  mRNA levels in HIF-1 $\alpha$ #1 and HIF-1 $\alpha$ #2 cells. **(b)** Hypoxia-dependent induction of BNIP3 is impaired in HIF-1 $\alpha$ #1 and HIF-1 $\alpha$ #2 cells. Stable cells were exposed to hypoxia (1% O<sub>2</sub>) for 24 h or kept at normoxia. Expression levels of HIF-1 $\alpha$  and BNIP3 mRNAs were measured by qRT-PCR and normalized to  $\beta$ -actin (n=3; values are mean $\pm$ S.D.; \*\*\*P< 0.005 relative to control by two-tailed Student's t test).

**Supplementary Fig. 4** Time course of phosphorylated Bad and Bim proteins in response to hypoxia treatment. Min6 cells were exposed to hypoxia for the indicated time points. Cells were treated during 8h with 1  $\mu$ M thapsigargin (Tg), or 1  $\mu$ M staurosporine (St). Whole cell extracts were prepared, and proteins were separated by SDS-PAGE and analyzed by immunoblotting with anti-phosphorylated Bad (p-Bad S112), anti-Bim, and anti- $\beta$ -actin.

**Supplementary Fig. 5** Caspase-12 activity is not induced by hypoxia in Min6 cells. Min6 cells were exposed to hypoxia (1% O<sub>2</sub>) for the indicated time points or kept at normoxia. Cells were treated with 1  $\mu$ M thapsigargin (Tg) for 48 h, or 1  $\mu$ M staurosporine (St) for 8 h. Caspase-12 activity was measured by a fluorometric assay kit (BioVision) according to manufacturer's instructions (n=4; values are mean $\pm$ S.D.; \*\*\*P< 0.005 relative to control by two-tailed

Student's t test). Results were analyzed using a fluorescence plate reader (Ex/Em = 400/505 nm).

**Supplementary Fig. 6** Knockdown efficiency of siRNAs against HIF-1 $\alpha$  (**a**), Arnt (**b**), ATF4 (**c**), XBP-1 (**d**), ATF6 (**e**). Min6 cells were transiently transfected with a control siRNA or specific siRNAs against HIF-1 $\alpha$ , Arnt, ATF4, XBP-1 and ATF6. 48 h after transfection, cells were exposed to hypoxia for 24 h or kept at normoxia. **f, g** UPR transcription factors have no effect on the hypoxia-dependent induction of HIF-1 $\alpha$  target genes GLUT1 (**f**) and PGK1 (**g**). Expression levels of HIF-1 $\alpha$ , Arnt, ATF4, XBP-1, ATF6, GLUT1 and PGK1 mRNAs were measured by qRT-PCR and normalized to  $\beta$ -actin mRNA levels (n=5; values are mean $\pm$ S.D.; \*\*P < 0.05; \*\*\*P < 0.005 relative to control by two-tailed Student's t test).

**Supplementary Fig. 7** LC3B-II protein is induced by hypoxia in Min6 cells. (**a**) Hypoxia up-regulates LC3B. Whole cell extract proteins were separated by SDS-PAGE and analyzed by immunoblot assay with anti-LC3B and anti- $\beta$ -actin antibodies. (**b**) LC3B-II is up-regulated in cells treated with 1  $\mu$ M of rapamycin.
