# Supplementary figures and images for: Acute hypoxia induces apoptosis of pancreatic β-cell by activation of the unfolded protein response and upregulation of CHOP
Source: PubMed Central journal article supplement — Cell Death Dis. 2012 Jun 14;3(6):e322–. doi: 10.1038/cddis.2012.66 (PMC3388238; doi:10.1038/cddis.2012.66), 2012-06-14

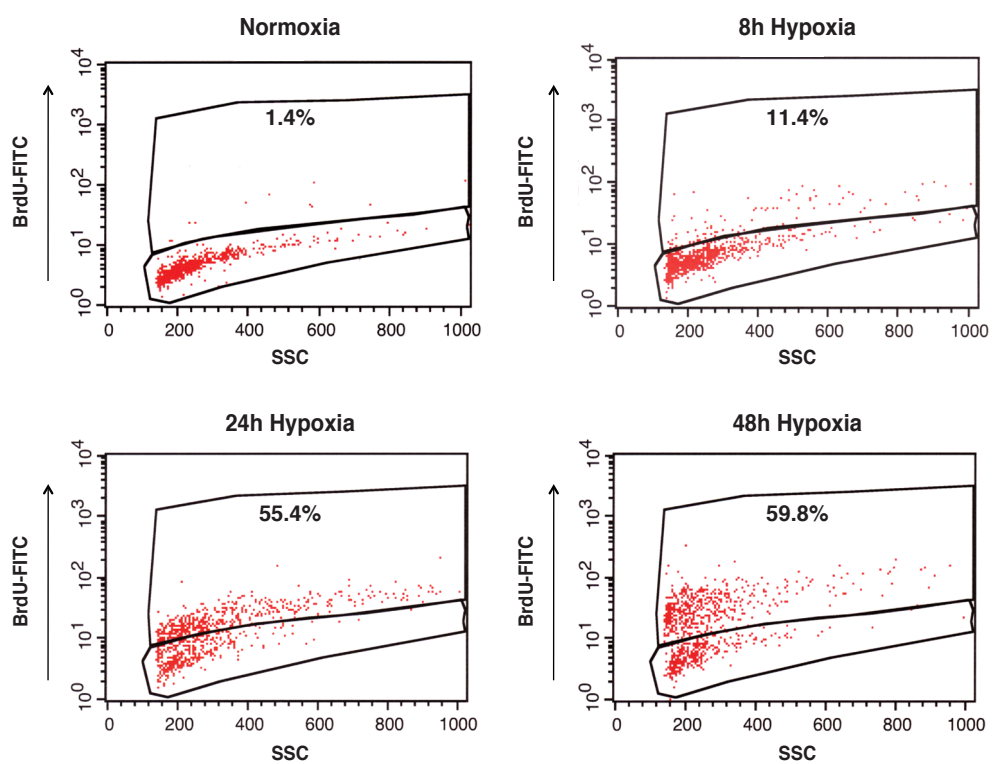

Supplement: cddis201266x1.pdf [file cddis201266x1.pdf]

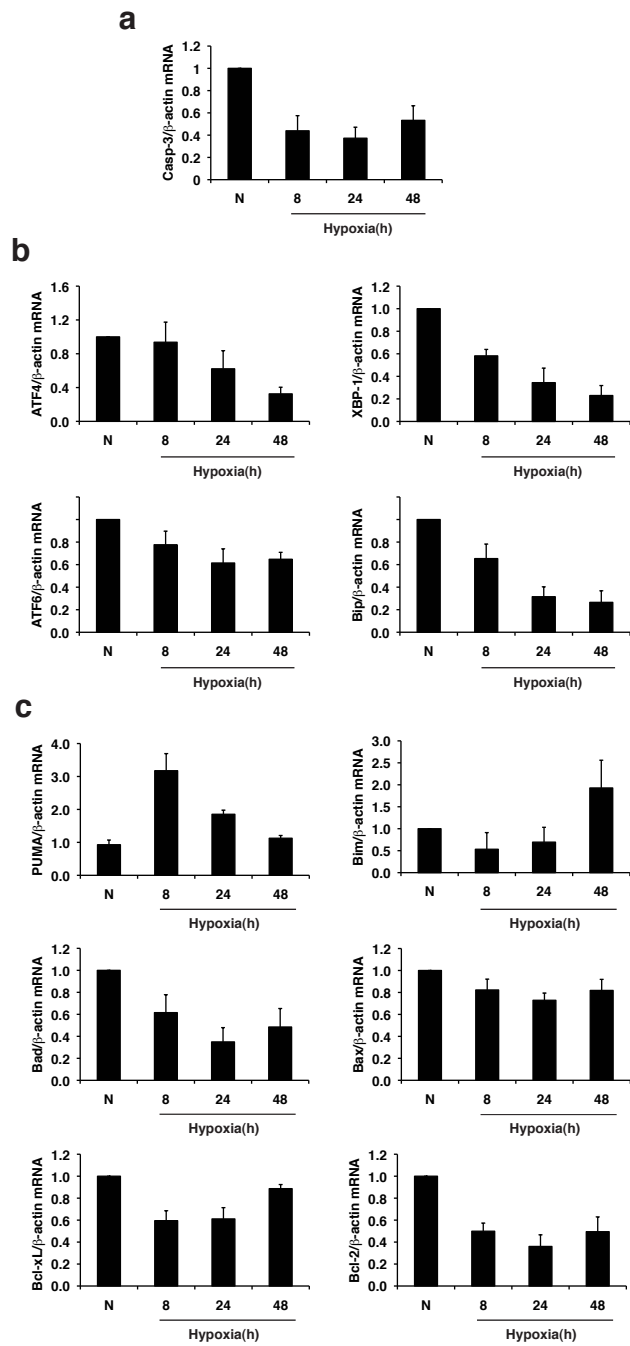

Supplement: cddis201266x2.pdf [file cddis201266x2.pdf]

**a**

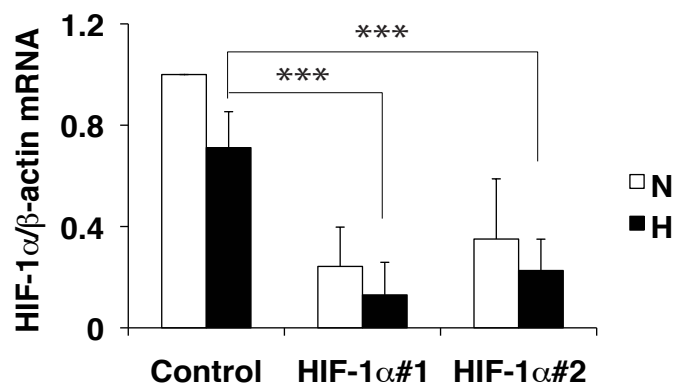

**b**

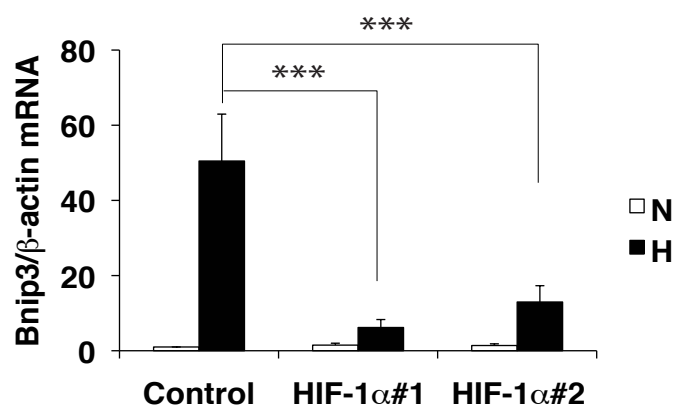

Supplement: cddis201266x3.pdf [file cddis201266x3.pdf]

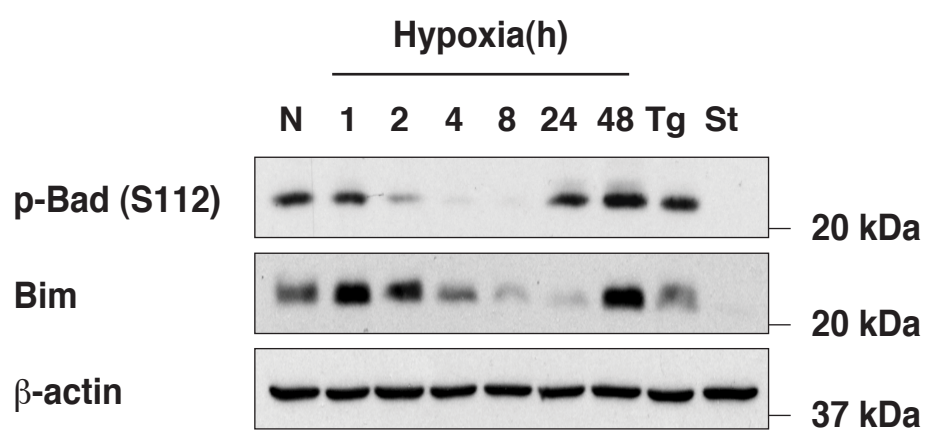

Supplement: cddis201266x4.pdf [file cddis201266x4.pdf]

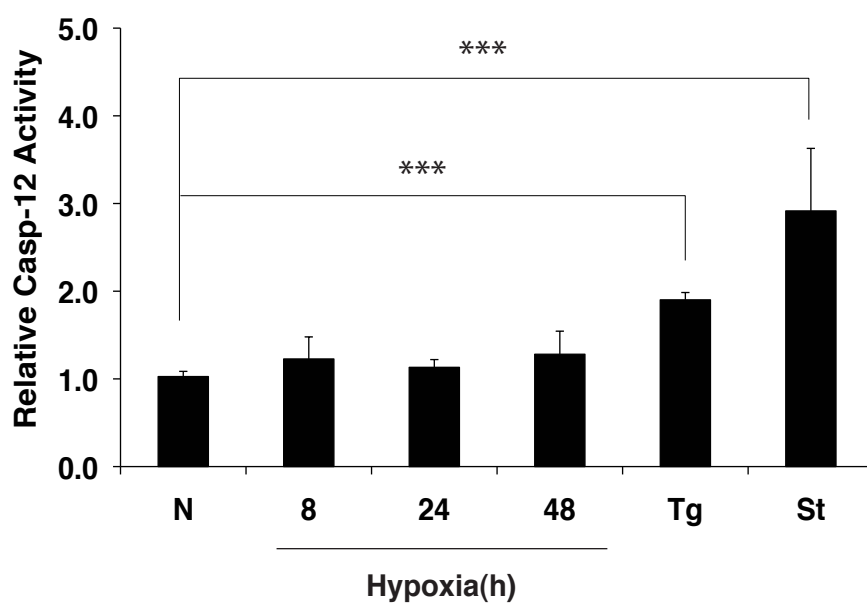

Supplement: cddis201266x5.pdf [file cddis201266x5.pdf]

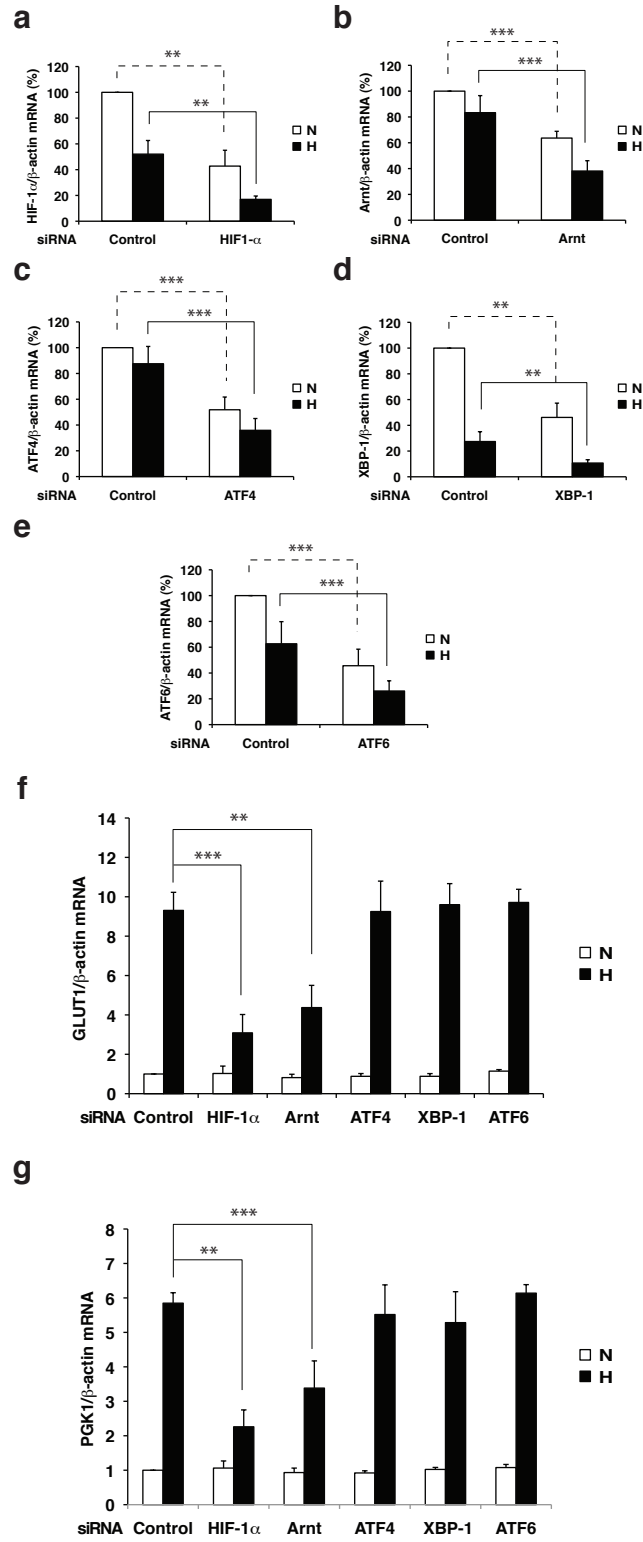

Supplement: cddis201266x6.pdf [file cddis201266x6.pdf]

**a**

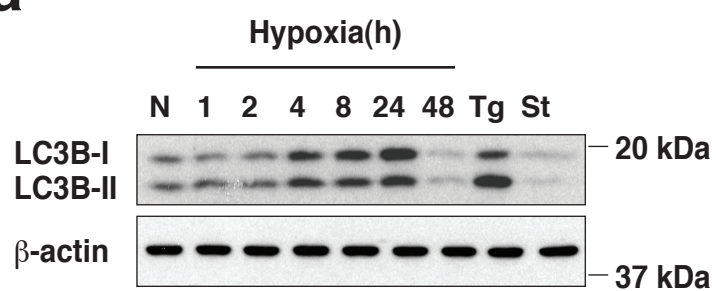

**b**

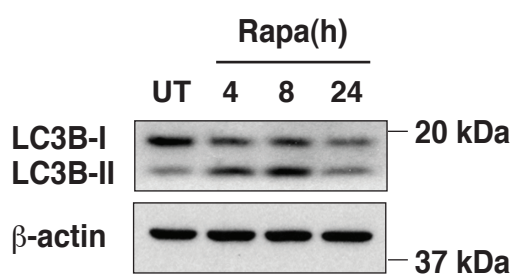

Supplement: cddis201266x7.pdf [file cddis201266x7.pdf]
